# Supplementary material
Source: Springer Nature journal article supplement (https://www.springermedizin.de/resource/supplementary/12943_2014_1433_MOESM1_ESM.pdf/9552988)
Supplement: MOESM1 [file 9552988]

## Supplementary figure S1

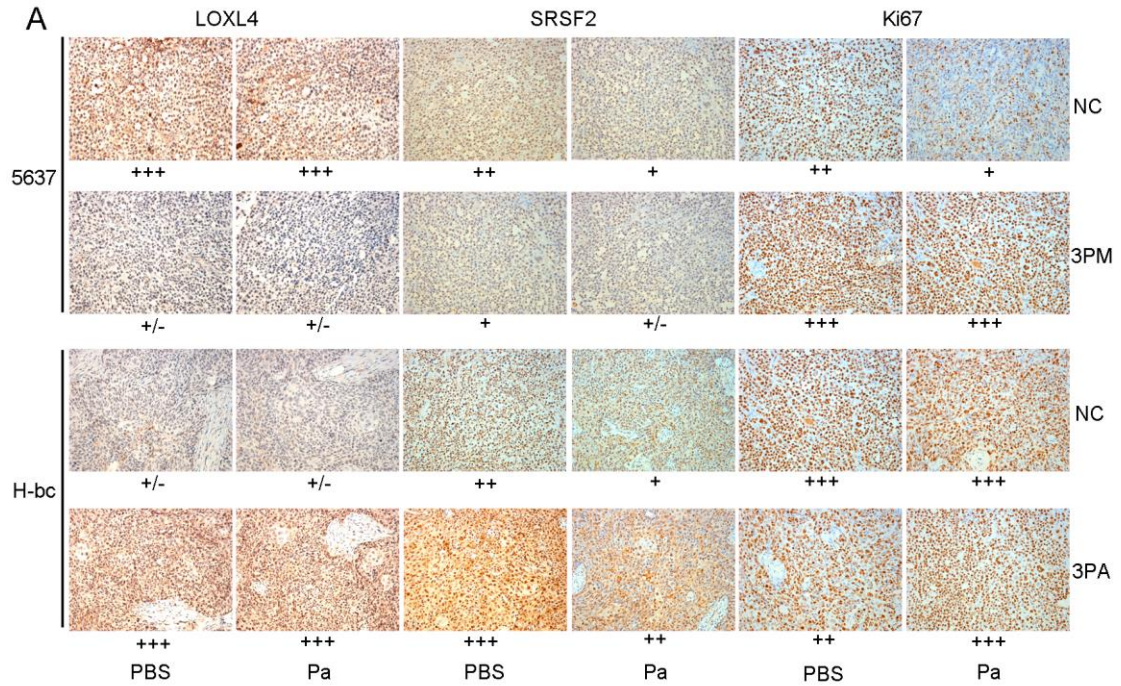

**B**

| Intraperitoneal treatment | 5637 tumors          |            |            |           | H-bc tumors          |            |            |           |
|---------------------------|----------------------|------------|------------|-----------|----------------------|------------|------------|-----------|
|                           | Intratumor treatment | anti-LOXL4 | anti-SRSF2 | anti-Ki67 | Intratumor treatment | anti-LOXL4 | anti-SRSF2 | anti-Ki67 |
| PBS                       | Ago-Mock             | +++        | ++         | ++        | Anta-Mock            | +/-        | ++         | +++       |
|                           | Ago-3P               | +/-        | +          | +++       | Anta-3P              | +++        | +++        | ++        |
| Pa                        | Ago-Mock             | +++        | +          | +         | Anta-Mock            | +/-        | +          | +++       |
|                           | Ago-3P               | +/-        | +/-        | +++       | Anta-3P              | +++        | ++         | +++       |

**Figure S1:** Immunostaining analysis of tumor tissues from *in vivo* study. **A**, The 5637 and H-bc tumor tissues from each group were fixed on one slide and immunostained for indicated antibody, respectively. Levels of Ki67, SRSF2, and LOXL4 proteins in each were determined by immunostaining. **B**, Levels of Ki67, SRSF2, and LOXL4 proteins were summarized in the table.
